# Supplementary material
Source: PubMed Central journal article supplement (PMC7376555)
Supplement: AEM.00653-20-s0001.pdf [file AEM.00653-20-s0001.pdf]

**Supplementary Figure 1.** Workflow diagram of quantitative proteomics analysis using TMT-based profiling. The  $\Delta 3\beta G$  strain was grown on Vogel's salts with sucrose for 16 h, followed by shifting to Vogel's salts containing cellobiose, cellulose (Avicel), sucrose, or no carbon supplementation. The resulting cultures were kept shaking for additional 4 h. Total proteins were extracted from the cultures and the protein extracts were digested with trypsin. The resulting peptide mixture was labeled by multiplexed isobaric tandem mass tag (TMT). The labeled peptides were mixed together, followed by SPS-MS3 analysis.

**Supplementary Figure 2.** Protein sequence alignment of CWH43 from the filamentous fungus *N. crassa* and the fission yeast *Schizosaccharomyces pombe*

**Supplementary Table 1.** Overlapped targets between the direct regulons of CLR-1, CLR-2, or XLR-1 and the proteomes up-regulated by cellobiose and/or Avicel

Fig. S1

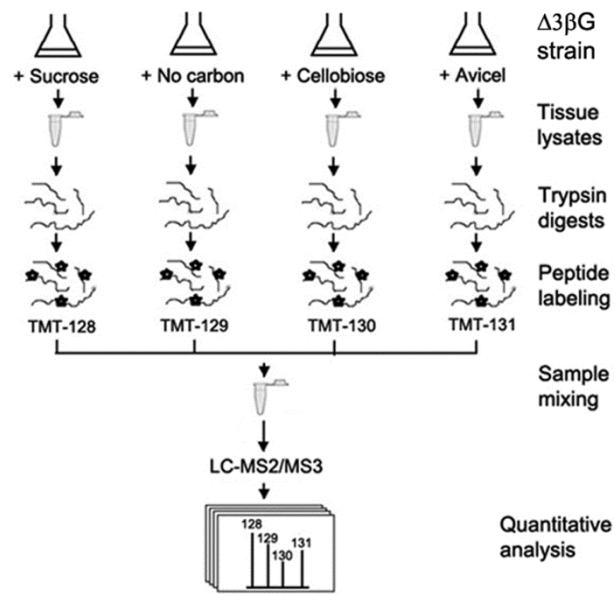

Fig. S2

N MASSRYKDKDAGVVLFSNGQWISWTHTVVAYAFLSALIIGCALHYHKIVKNEWYGYPDE 60  
S -----MARQHSANSVVFNSWVWAHTVCASAAFLCALAVGLSLHYKKIVKNGVAGWPQE 55  
      :.. : \*\*..\*:\*:\* \*\* \* \*\*\*.\*\* :\* :\*\*\*:\*\*\*\*\* \*\*:\*

N WFPSVSATIGDRYPERSIFMIFIAITSGPRFALVGLWYLLTAKPGRVLPKAI AISGVRT 120  
S WWPSVSATIGDWYPERNLFQILIALTSGPRFALVFLWWFVTRVEHPRAAAAIAICGVRT 115  
      \*:\*\*\*\*\* \*\*\*. :\* \*:\*:\*:\*:\*:\* \*\*::\* \*\*\*\*\* \*\*:\*

N LTCGGWYITSTDDHDWHDILMILYIVFTIPWTTGCIALSPPNAKAI-KYRKWIAGSFFG 179  
S VSCGGWYITSSDDHDAHDVLMILYVVCNLPWMLGSI SYTPQGYHASRRQRKIVASLFFG 175  
      :\*\*\*\*.\*\*\*\*\*:\*\*\* \*\*:\*:\*:\*:\* .:\*\* \*.\*: :\* . :\* : \*\* :\*. \*\*\*

N TLVPLVYFFIQHKVHRVAGAYTVYAFFEWALILFDVAFDAVTALDFDTFEVVVKDVKGAS 239  
S ALPPMIYFFIRHKIQRIPGAYTHYSFFEWLIVADVTFDLKSVEFSAIEISVRAVGSSS 235  
      :\* \*:\*:\*:\*:\*:\*:\*: \*\*\*\* \*:\*:\*:\* \*\*:\* \*\*:\*:\*:.. :\*: :\*: \* : \* .:\*

N KGANASSV-----PAAVL-EKEKEKATA-----GVYSAGFNL 270  
S AEIEKPAVSESNPTVTSVQLSTKTAVPKALSVAEAEKINGAKADITFLDRPGLIKSLIF 295  
      : :\* \* \* : . \* \*\* .. : : :

N GPALDIAADVHGFVFWSTLTSLGLVIWYFPLWHMGISGYEAFVMATISPVLLGIRPLRS 330  
S SPTVTYATDLYLSYCSWSVYTSLAITLFYFNIWELGVTGSELAVISTLTPFWLGIRSFRE 355  
      .\*:\* \*:\*:\* .: \*\*. \*\*\*. :. :\*\* \*: \*:\*:\* \* \*:\*:\*:\* \*\*\*\*\* :\*

N LIVNNQ--RLFHVLSLAGLLAYKVHDPVYRLFTVGFVFMGCLAWAATWSSDSVHPSRLE 388  
S SVASHTGQIVVQACVILGMAAYI IDEPLGRLLVVALANMALGIDWAITWSGLSDRISPQD 415  
      :..: :.. : \*:\* \*\* :. :\*: \*\*:.\*. :. : : \*\* \*\*\*, \* : \* :

N SRVIAWLAGLLMSSIAKFAWYTNPIWPVMAENGGWNGTGLVLA ILAVLRFTRKAPLNS 448  
S N-SFILAAGFILANLSKMANHSSNPVWPIVDSRSGGWNKTGLLLALLALAQFASRPPIA 474  
      . : \*\*:::.. :\*: \* :\*\*\*:\*\*\*:.. .. \*\*\*\*\* \*\*\*:\*\*\*:\*\*\*: :\*: : \* : :

N -WGVSQQKNGSSLLSAIGIGGLFFAIHSLSDTSTMILWWGGFPVRGPVSNVHA-YYTI 506  
S PQEIIKTDNSRTWSSSLGLGGTMFALYSLFADSGTIVAWSWTGYPAKGPVPGVMSGAVTI 534  
      : : .\*. : \*:\*:\*:\* \*\*:\*:\*:\*:\*:\*:\*: \* \* \*:\*:\*: .\* : \*\*

N AAMTGGLLIG-VFRPGMI---TNWTAYGVACVGAAMLTYEQWFGYYGALILTYYLMAIA 562  
S SAMCAGLALAGSSSASRVVNHPAWLSIGVGA--CIVMYQCRDWAGYAGGLVYGLFLMSIF 592  
      :\*\* \*\* :. : : \* : \*\*.. : : .:\* \*\* \*:\*: \*\*:\*

N VPMISKAACKNPAVTFGVGFLFYNLLVLFHVWVYAFVPGGPVYREHTDWIMLTTMLTI 622  
S PKMLQESAFRGSALVYYLMWLTITGLILADVWATAYAFVPGGVYMRERTDIVLTAELAI 652  
      \*.:\*: \* . \*.: : :\* \*\*.\*\*\*.\*\*\*\*\*\* \*\*:\*:\* \*\* : : :\*:\*



**Table S1. Overlapped targets between the direct regulons of CLR-1, CLR-2, or XLR-1 and the proteomes up-regulated by cellobiose and/or Avicel**

| NCU no.                                                    | Locus                 | Annotation or domain                             | Up-regulation condition <sup>1</sup> | Correlation between mRNA and protein <sup>2</sup> |
|------------------------------------------------------------|-----------------------|--------------------------------------------------|--------------------------------------|---------------------------------------------------|
| <i>Targets of both the CLR-1 and CLR-2 direct regulons</i> |                       |                                                  |                                      |                                                   |
| NCU00801                                                   | <i>cdt-1</i>          | Cellodextrin transporter                         | CB vs. NC, AV vs. NC                 | yes                                               |
| NCU07340                                                   | <i>cbh-1</i>          | Exo- $\beta$ -1,4-glucanase or cellobiohydrolase | CB vs. NC, AV vs. NC                 | yes                                               |
| NCU09680                                                   | <i>gh6-2 or cbh-2</i> | Exo- $\beta$ -1,4-glucanase or cellobiohydrolase | CB vs. NC, AV vs. NC                 | yes                                               |
| NCU07190                                                   | <i>gh6-3</i>          | Exo- $\beta$ -1,4-glucanase cellobiohydrolase    | CB vs. NC, AV vs. NC                 | yes                                               |
| NCU00206                                                   | <i>cdh-1</i>          | Cellobiose dehydrogenase                         | CB vs. NC, AV vs. NC                 | yes                                               |
| NCU05864                                                   |                       | Signal peptide-containing protein                | CB vs. NC, AV vs. NC                 | yes                                               |
| <i>Targets of the CLR-2 direct regulon</i>                 |                       |                                                  |                                      |                                                   |
| NCU08114                                                   | <i>cdt-2</i>          | Cellodextrin and xylo-dextrin transporter        | CB vs. NC, AV vs. NC                 | yes                                               |
| NCU08760                                                   | <i>NcLPMO9E</i>       | Lytic polysaccharide monoxygenase 1              | CB vs. NC, AV vs. NC                 | yes                                               |
| NCU05956                                                   | <i>gh2-2</i>          | Intracellular $\beta$ -galactosidase             | CB vs. NC                            | yes                                               |
| NCU01900                                                   | <i>gh43-2</i>         | Intracellular $\beta$ -xylosidase                | AV vs. NC                            | yes                                               |
| NCU00870                                                   |                       | SET domain-containing protein                    | CB vs. NC, AV vs. NC                 | yes                                               |
| <i>Targets of the CLR-1 direct regulon</i>                 |                       |                                                  |                                      |                                                   |
| NCU00326                                                   |                       | Calcium homeostasis protein Regucalcin           | CB vs. NC, AV vs. NC                 | yes                                               |
| NCU05574                                                   |                       | Acetyltransferase domain                         | CB vs. NC, AV vs. NC                 | yes                                               |
| NCU07487                                                   | <i>bgl-4</i>          | Intracellular $\beta$ -glucosidase               | CB vs. NC, AV                        | yes                                               |

|                                            |               |                                   |                      |     |
|--------------------------------------------|---------------|-----------------------------------|----------------------|-----|
|                                            |               |                                   | vs. NC               |     |
| NCU09689                                   |               | $\alpha/\beta$ -hydrolase domain  | CB vs. NC, AV vs. NC | yes |
| <i>Targets of the XLR-1 direct regulon</i> |               |                                   |                      |     |
| NCU04401                                   |               | Fructose-bisphosphate aldolase    | CB vs. NC, AV vs. NC | yes |
| NCU09652                                   | <i>gh43-5</i> | Intracellular $\beta$ -xylosidase | CB vs. NC, AV vs. NC | yes |
| NCU00891                                   |               | Xylitol dehydrogenase             | AV vs. NC            | yes |
| NCU02343                                   | <i>gh51-1</i> | $\alpha$ -arabinofuranosidase     | AV vs. NC            | yes |
| NCU08384                                   |               | Intracellular D-xylose reductase  | AV vs. NC            | yes |
| NCU09705                                   |               | Intracellular aldose 1-epimerase  | AV vs. NC            | yes |

<sup>1</sup> The proteomes up-regulated by cellobiose or Avicel was derived from the comparisons of CB vs. NC or AV vs. NC, respectively (Fold change  $\geq 1.3$ , p-values  $< 0.05$ ).

<sup>2</sup> Correlation analysis between mRNA and protein abundance was performed with the proteome data of this study and the transcriptome data from a previous study (Coradetti ST, Xiong Y, Glass NL. 2013. Analysis of a conserved cellulase transcriptional regulator reveals inducer-independent production of cellulolytic enzymes in *Neurospora crassa*. *MicrobiologyOpen* 2:595-609. <https://doi.org/10.1002/mbo3.94>).
